# Supplementary material for: Catalytic oxidation mechanisms of carbon monoxide over single- and double-vacancy Mn-embedded graphene
Source: Royal Society of Chemistry journal article supplement (doi:10.1039/d0nj01500h), 2020-01-01
Supplement: d0nj01500h1.pdf [file d0nj01500h1.pdf]

## Supplementary Information

# Catalytic oxidation mechanisms of carbon monoxide over single- and double-vacancy Mn-embedded graphene

Mingming Luo<sup>a</sup>, Zhao Liang<sup>a</sup>, Mingwei Chen<sup>a</sup>, Shaik Gouse Peera<sup>b</sup>, Chao Liu<sup>a,c,\*</sup>,  
Hui Yang<sup>a</sup>, Xiaopeng Qi<sup>a</sup>, Juan Liu<sup>d</sup>, Tongxiang Liang<sup>a,\*</sup>

<sup>a</sup> Engineering Research Center for Hydrogen Energy Materials and Devices, Faculty of Materials Metallurgy and Chemistry, Jiangxi University of Science and Technology, Ganzhou 341000, China

<sup>b</sup> Department of Environmental Science and Engineering, Keimyung University, Daegu 42601, Republic of South Korea

<sup>c</sup> State Key Laboratory of Metastable Materials Science and Technology, Yanshan University, Qinhuangdao 066004, China

<sup>d</sup> Department of Mining and Materials Engineering, McGill University, Montreal, QC H3A0C5, Canada

\* Corresponding Authors.

E-mail address: [liuchao198967@126.com](mailto:liuchao198967@126.com) (Chao Liu) and [liang\\_tx@126.com](mailto:liang_tx@126.com) (Tongxiang Liang).

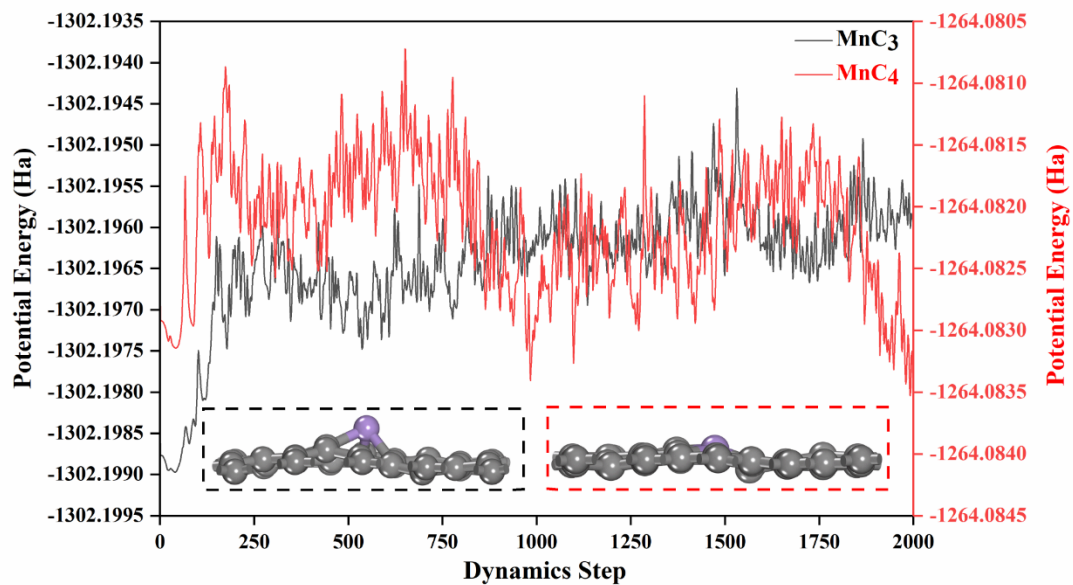

Fig. S1. The final structure (MnC<sub>3</sub> and MnC<sub>4</sub>) from dynamics simulation at 1000 K and potential energy change.

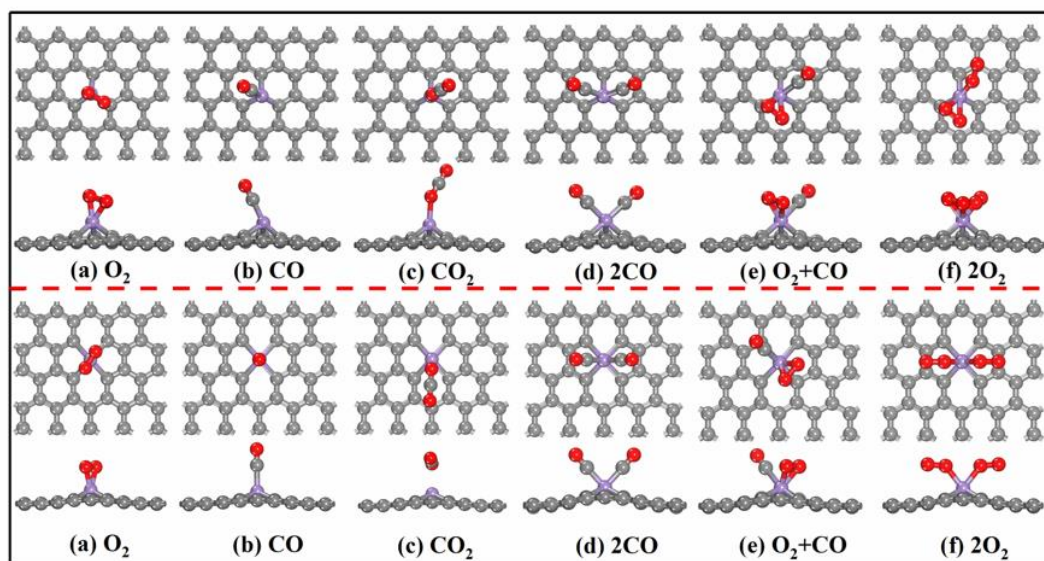

Fig. S2. The most stable configuration of O<sub>2</sub>, CO, CO<sub>2</sub> and bimolecular co-adsorption on MnC<sub>3</sub> and MnC<sub>4</sub>.

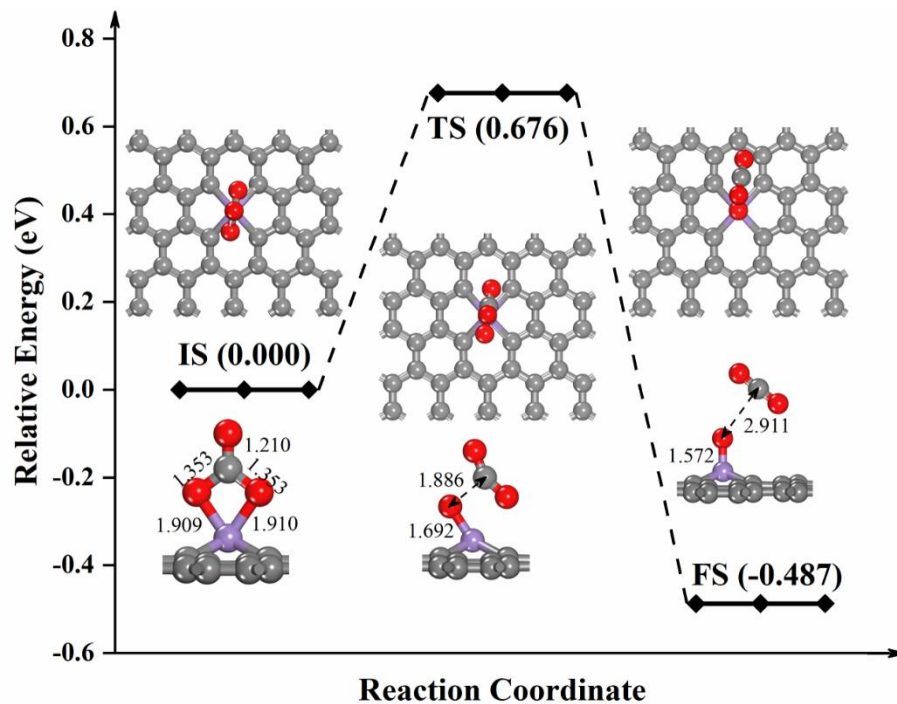

Fig. S3. OCOO is cracked into O and CO<sub>2</sub>.

Table S1 The energy barrier of RDS (reaction mechanism) and second CO<sub>2</sub> generation of MnC<sub>3</sub> and MnC<sub>4</sub>, \* represents the substrate at room temperature (298.15 K), -- represents the CO oxidation process has not been studied (or the reaction is not RDS and the effect of temperature has not been studied), the unit is eV.

| Models            | ER    | LH    | O+CO→CO <sub>2</sub> | TER   |
|-------------------|-------|-------|----------------------|-------|
| MnC <sub>3</sub>  | 0.832 | 0.829 | --                   | --    |
| *MnC <sub>3</sub> | 0.835 | 0.761 | --                   | --    |
| MnC <sub>4</sub>  | --    | 0.568 | 0.851                | 1.011 |
| *MnC <sub>4</sub> | --    | 0.538 | 0.767                | 1.083 |
